# Supplementary material for: Multi-Omics Analysis Delineates Molecular Signatures of Spinal Ependymal Tumor
Source: Research Square preprint supplement (doi:10.21203/rs.3.rs-5761045/v1), 2025-01-08
Supplement: Supplementary file 2 [file 5afcc77c6e1fb748fb546ae5.docx]

Supplementary Table S2. Clinicopathologic information of 25 spinal ependymal tumor patients

| Patient ID | Gender | Age | Location | Resection | Tumor type | MYCN  amplified |
| --- | --- | --- | --- | --- | --- | --- |
| SP-EPN 1 | Female | 28 | C1-4 | GTR | Ependymoma | No |
| SP-EPN 2 | Female | 37 | C1-7 | GTR | Ependymoma | No |
| SP-EPN 3 | Female | 31 | C3-5 | GTR | Ependymoma | Yes |
| SP-EPN 4 | Male | 65 | C3-T2 | GTR | Ependymoma | Yes |
| SP-EPN 5 | Female | 44 | C2-T3 | GTR | Anaplastic ependymoma | - |
| SP-EPN 6 | Male | 34 | C3-6 | GTR | Anaplastic ependymoma | - |
| SP-EPN 7 | Male | 36 | C4-6 | STR | Anaplastic ependymoma | - |
| SP-EPN 8 | Male | 43 | L2-S2 | STR | Anaplastic ependymoma | No |
| SP-SE 1 | Male | 54 | T8-12 | GTR | Subependymoma | - |
| SP-SE 2 | Male | 22 | C1-6 | GTR | Subependymoma | - |
| SP-SE 3 | Male | 48 | T3-8 | GTR | Subependymoma | - |
| SP-SE 4 | Male | 48 | C3-6 | GTR | Subependymoma | - |
| SP-SE 5 | Female | 67 | C2-6 | STR | Subependymoma | - |
| SP-SE 6 | Male | 37 | C6-T4 | GTR | Subependymoma | - |
| SP-SE 7 | Male | 24 | C2-C7 | GTR | Subependymoma | - |
| SP-MPE 1 | Female | 28 | T10-S2 | STR | Myxopapillary ependymoma | No |
| SP-MPE 2 | Male | 44 | L2-3, S1-2 | GTR | Myxopapillary ependymoma | No |
| SP-MPE 3 | Male | 43 | L1-S5 | GTR | Myxopapillary ependymoma | No |
| SP-MPE 4 | Male | 13 | L4-S1 | GTR | Myxopapillary ependymoma | - |
| SP-MPE 5 | Female | 52 | L2-3 | GTR | Myxopapillary ependymoma | - |
| SP-MPE 6 | Male | 34 | L3-4 | GTR | Myxopapillary ependymoma | - |
| SP-MPE 7 | Female | 35 | L1-3 | GTR | Myxopapillary ependymoma | - |
| SP-MPE 8 | Female | 39 | Lumbosacral multiple | STR | Myxopapillary ependymoma | - |
| SP-MPE 9 | Male | 32 | S3-4 | GTR | Myxopapillary ependymoma | - |
| SP-MPE 10 | Female | 57 | L1-2 | GTR | Myxopapillary ependymoma | - |

GTR, gross total resection; STR, subtotal resection.
