# Supplementary material for: Multi-Omics Analysis Delineates Molecular Signatures of Spinal Ependymal Tumor
Source: Research Square preprint supplement (doi:10.21203/rs.3.rs-5761045/v1), 2025-01-08
Supplement: Supplementary file 3 [file b7bf9eef89134a248060c33d.docx]

| Patient ID | GFAP | EMA | H3K27me3 | Olig-2 | S100 | SOX10 | Ki-67 |
| --- | --- | --- | --- | --- | --- | --- | --- |
| SP-EPN 1 | **+** | **+** | **+** | **-** | **/** | **/** | 1-2% |
| SP-EPN 2 | **+** | **+** | **+** | **-** | **/** | **/** | 1% |
| SP-EPN 3 | **+** | **-** | **+** | **/** | **/** | **/** | 3% |
| SP-EPN 4 | **+** | **/** | **+** | **/** | **/** | **/** | <5% |
| SP-EPN 5 | **+** | **/** | **/** | **/** | **/** | **/** | <5%, part 5-10% |
| SP-EPN 6 | **+** | **-** | **/** | **+** | **/** | **/** | 10-15% |
| SP-EPN 7 | **+** | **-** | **+** | **+** | **/** | **/** | 15% |
| SP-EPN 8 | **+** | **+** | **+** | **/** | **/** | **/** | 10-15% |
| SP-SE 1 | **+** | **-** | **+** | **/** | **/** | **/** | <1% |
| SP-SE 2 | **/** | **/** | **/** | **/** | **/** | **/** | <5% |
| SP-SE 3 | **/** | **/** | **/** | **/** | **/** | **/** | <1% |
| SP-SE 4 | **+** | **-** | **/** | **+** | **/** | **/** | 2% |
| SP-SE 5 | **+** | **+** | **/** | **-** | **/** | **-** | 1% |
| SP-SE 6 | **+** | **-** | **/** | **-** | **/** | **/** | 1-3%, part 10% |
| SP-SE 7 | **+** | **+** | **+** | **/** | **/** | **/** | 3-15% |
| SP-MPE 1 | **+** | **-** | **+** | **-** | **/** | **/** | 1-2% |
| SP-MPE 2 | **+** | **+** | **-** | **+** | **/** | **/** | 1% |
| SP-MPE 3 | **+** | **/** | **/** | **/** | **/** | **/** | <3% |
| SP-MPE 4 | **/** | **+** | **+** | **/** | **/** | **/** | 1-5% |
| SP-MPE 5 | **+** | **-** | **+** | **-** | **/** | **/** | 1-3% |
| SP-MPE 6 | **+** | **-** | **+** | **-** | **-** | **-** | **+** |
| SP-MPE 7 | **/** | **-** | **+** | **/** | **/** | **/** | 3-7% |
| SP-MPE 8 | **+** | **+** | **+** | **-** | **/** | **/** | 1-2%, part 15% |
| SP-MPE 9 | **+** | **-** | **/** | **+** | **+** | **/** | Part 10% |
| SP-MPE 10 | **+** | **+** | **+** | **+** | **/** | **/** | 1-3%, part 10% |

**Table S3. Immunohistochemical results of 24 cases of spinal ependymal tumors**

+, Positive; -, Negative; /, Not tested.
